# Supplementary material for: Fabrication of efficient surface ion-imprinted materials based on rice husk ash for Cu 2+ ion detection in crayfish and Cu 2+ ion adsorption from tap water
Source: Royal Society of Chemistry journal article supplement (doi:10.1039/d4nj05161k), 2025-01-01
Supplement: d4nj05161k1.pdf [file d4nj05161k1.pdf]

## Supporting Information

Fabrication of efficient surface ion-imprinted materials based on rice husk ash for Cu<sup>2+</sup> ion detection in crafish and adsorption from tap water

Ling Fu<sup>a1</sup>, Xuelong Huang<sup>b1</sup>, Senmao Liu<sup>a1</sup>, Liwen Ma<sup>a</sup>, Haixin Ding<sup>a</sup>, Haifeng He<sup>a\*</sup>,  
Xiuhong Liu<sup>a\*</sup>

<sup>a</sup>Jiangxi Engineering Laboratory of Waterborne Coating, School of Chemistry and Chemical Engineering, Jiangxi Science and Technology Normal University, Nanchang 330013, People's Republic of China.

<sup>b</sup>College of Medical Information Engineering, Gannan Medical University, Ganzhou, 341000, China.

<sup>1</sup> These authors equally contributed to this work.

\*Corresponding author. Email: [hehf0427@jxstnu.com.cn](mailto:hehf0427@jxstnu.com.cn), [xiuhong0627@163.com](mailto:xiuhong0627@163.com).

### SI. General information

Unless stated otherwise, all analytical grad chemicals and solvents used in this paper were purchased from commercial vendors. The salts used in stock solutions of metal ions were SnSO<sub>4</sub>, K<sub>2</sub>SO<sub>4</sub>, Ba(NO<sub>3</sub>)<sub>2</sub>, Ca(NO<sub>3</sub>)<sub>2</sub>·4H<sub>2</sub>O, Cr(NO<sub>3</sub>)<sub>3</sub>·9H<sub>2</sub>O, ZnSO<sub>4</sub>·7H<sub>2</sub>O, CoSO<sub>4</sub>·7H<sub>2</sub>O, MgSO<sub>4</sub>, Cd(NO<sub>3</sub>)<sub>2</sub>·4H<sub>2</sub>O, Hg(NO<sub>3</sub>)<sub>2</sub>·H<sub>2</sub>O, Sr(NO<sub>3</sub>)<sub>2</sub>, Al(NO<sub>3</sub>)<sub>3</sub>·9H<sub>2</sub>O, MnSO<sub>4</sub>·4H<sub>2</sub>O, Ni(NO<sub>3</sub>)<sub>2</sub>·6H<sub>2</sub>O, CuSO<sub>4</sub>·5H<sub>2</sub>O. The morphology of the materials were characterized by scanning electron microscopy (SEM, JSM-IT500). The specific surface area and pore-size distribution of the materials were recorded using an ASAP2010 (Micromeritics Inc., USA) BET-BJH instrument at 77 K within the P/P<sub>0</sub> range of 0.05-0.2. The samples were degassed at 150 °C for 4 h under vacuum prior to the N<sub>2</sub> adsorption/desorption measurements. Fourier transform

infrared spectra (FTIR) were recorded on an AVATAR 360 spectrometer (Nicolet, USA) using the KBr disk method within the range of 4000–400  $\text{cm}^{-1}$ . The concentrations of metal ions were determined with atomic absorption spectrometer (Hitachi Z-8100, Japan). X-ray photoelectron spectroscopy (XPS) measurements were carried out by a Thermo VG Multilab 2000 spectrometer with an Al Ka X-ray source. Fluorescence spectra was determined by a Hitachi F-4600 fluorescence spectrophotometer.

### **SII. Determination of Detection Limit**

The detection limit was calculated based on fluorescence titration as a function the solubility of  $\text{Cu}^{2+}$  at  $\lambda_{\text{em}}$  611 nm. The fluorescence emission spectrum of free probe RHA-CIIM was measured over 10 times to determine standard deviation for blank measurement. A linear plot was constructed with  $F/F_0$  against the concentration of  $\text{Cu}^{2+}$  for determining the slope. Using the slope the detection limit was calculated from the following equation.<sup>1,2</sup>

$$\text{LOD}=3\sigma/K$$

where k is the slope of the fitting line, the mean standard deviation  $\sigma$  of  $F/F_0$  was determined after 10 repetitive measurements.

### **SIII. Preparation of RH-CIIM**

#### **SIII-1. Preparation of P-3**

To prepare **P-3**, **P-1** (5 mmol, 2.49g) was fully dissolved in 30 mL ethanol under nitrogen protection, then a mixture of **P-2** (7.5 mmol, 2.75g) and ethanol (5mL) was added, and the resulting mixture was stirred in an oil bath at 80°C for 10 h.<sup>3</sup>

#### **SIII-2. Synthesis of RHA@MCM-41, RHA-CNIM and RHA-CIIM.**

RHA@MCM-41 was prepared according to the methods reported in the literature.<sup>4</sup> **P-3** and  $\text{CuCl}_2 \cdot 2\text{H}_2\text{O}$  formed prepolymerization units, and then through dehydration condensation reaction cross-linked on the surface of RHA@MCM-41 to prepare RHA-CIIM. The resultant route is shown in Fig 1. 0.06 g  $\text{CuCl}_2 \cdot 2\text{H}_2\text{O}$  was dissolved in 5 mL ethanol and 20 mL of the as-prepared **P-3** ethanol solution stirred at room temperature for 30 minutes. After that, add

0.1g RHA@MCM-41 and stir the mixture at 80°C for 24 h. Freshly prepared RHA-CIIM are first washed three times with ethanol to eliminate unreacted reactants, then several times with EDTA until  $\text{Cu}^{2+}$  is no longer detectable in the filtrate. Then wash with DW, vacuum dry at 60°C, you can get the required product. At the same time, RHA-CNIM was synthesized by a similar method without  $\text{Cu}^{2+}$ .

#### **SIV. General procedures of the fluorometric determination of $\text{Cu}^{2+}$ using the proposed ion-imprinted polymer.**

In cuvette, 1992  $\mu\text{L}$  distilled water was added, then 4 $\mu\text{L}$  free probe RHA-CIIM (5mg/mL) was added, finally 0.4  $\mu\text{L}$ , 0.8  $\mu\text{L}$ , 1.2  $\mu\text{L}$ , 1.6  $\mu\text{L}$ , 2.0  $\mu\text{L}$ , 2.4  $\mu\text{L}$ , 2.8  $\mu\text{L}$ , 3.2  $\mu\text{L}$ , 3.6  $\mu\text{L}$ , 4.0  $\mu\text{L}$ , 4.4  $\mu\text{L}$ ,  $\text{Cu}^{2+}$  (5 mg/mL) was gradually added, respectively, and the fluorescence signal was recorded at  $\lambda_{\text{ex}} = 330 \text{ nm}$ ,  $\lambda_{\text{em}} = 611 \text{ nm}$ .

#### **SV. Adsorption experiments**

All batch experiments were repeated three times and performed in a 100 mL conical flask containing 10 mg of the adsorbent and 50 mL of 250 mg/L Cu(II) solution at pH 6, which placed on a rotary shaker with speed of 150 rpm 120 min at room temperature. The Cu(II) and other metal ions concentration were analyzed by using the AAS method. The  $\text{Cu}^{2+}$  uptake capacity of the RHA-CIIM were evaluated under different conditions, such as pH,  $\text{Cu}^{2+}$  initial concentration, and time in a batch mode. For the pH-effect study, pH was adjusted by adding HCl or NaOH at different concentrations (0.01-1.0 mol/L) to reach pH 1-6. Isotherm tests were performed with initial  $\text{Cu}^{2+}$  concentrations ranged from 5 to 250 mg/L at 308K. Adsorption kinetics was conducted at a time range of 1-180 min. All experiments were conducted in triplicates. The  $q_t$  and  $q_e$  (mg/g) represent the adsorption quantity of  $\text{Cu}^{2+}$  at different time  $t$  (min) and equilibrium, which were calculated using Eqs.<sup>5</sup>

$$q_{t,e} = \frac{(C_0 - C_{t,e}) \times V}{m}$$

Where  $C_{t,e}$  and  $C_0$  (mg/L) are  $\text{Cu}^{2+}$  concentration at time  $t$  at equilibrium and initial,  $m$  (g) is the mass of sorbent and  $V$  (L) is solution volume.

## **SVI. Adsorption isotherms and kinetics models**

### **SVI-1. Detailed description of isotherms models**

Langmuir model describes a monolayer coverage in which all adsorption sites on the adsorbent are identical. Freundlich isotherm is established on the assumption that the adsorption is a multilayer one and the adsorption surfaces are heterogeneous. While the Temkin isotherm model assumes that the energy of the adsorption decreases with increasing the coverage of adsorption sites with adsorbate. The three models are described as follows <sup>6</sup>:

$$\text{Langmuir: } q_e = \frac{K_L q_{\max} C_e}{1 + K_L C_e} \quad (\text{S1})$$

$$\text{Freundlich: } q_e = K_F C_e^n \quad (\text{S2})$$

$$\text{Temkin: } q_e = \frac{Rt}{b} \ln K_t + \frac{Rt}{b} \ln C_e \quad (\text{S3})$$

Where  $C_e$  (mg/L) is the equilibrium  $\text{Cu}^{2+}$  concentration.  $q_{\max}$  and  $q_e$  (mg/g) stand for the maximum and equilibrium uptake capacity of  $\text{Cu}^{2+}$  by RHA-CIIM.  $K_L$  (L/mg) represent Langmuir constant.  $K_F$  ( $\text{mg}^{1-n}\text{L}^n/\text{g}$ ) and  $n$  are Freundlich constants.  $R$  (8.314 J/mol. K) and  $t$  (308 K) are the gas constant and temperature, respectively.  $Rt/b$  ( $B$ ) (J/mol) and  $K_t$  (L/g) stand for Temkin constants.

### **SVI-2. Detailed description of kinetics models**

To analyze the adsorption process of  $\text{Cu}^{2+}$  onto RHA-CIIM, pseudo-first-order and pseudo-second-order kinetic models were used to fit the experimental kinetics data.

The linear forms of the two models are expressed as follows <sup>7</sup>:

pseudo-first-order:  $q_t = q_e(1 - e^{-k_1 t})$  (S4)

pseudo-second-order:  $q_t = \frac{k_2 t q_e^2}{1 + k_2 t q_e}$  (S5)

Where  $q_t$  (mg/g) and  $q_e$  (mg/g) are the adsorption capacity at time  $t$  and equilibrium, respectively.  $k_1$  ( $\text{min}^{-1}$ ) and  $k_2$  ( $\text{gmg}^{-1}\text{min}^{-1}$ ) represent rate constant of pseudo-first-order adsorption and pseudo-second-order model, respectively.

## SVII. Crayfish digestion procedure

The material was broken down in a microwave digestion system after a mixture of 9 mL of concentrated  $\text{HNO}_3$  solution was added to the digestion tube. Leave the microwave digestion tank covered for a full day. After that, the crayfish were broken down in three batches using a microwave digestion system that contained 6 mL of  $\text{HNO}_3$  (65%) and 4 mL of  $\text{H}_2\text{O}_2$  (30%). Three stages make up the microwave digesting system: the programming temperature rises from  $130^\circ\text{C}$  (hold for 5.0 minutes) to  $160^\circ\text{C}$  (hold for 10 minutes), and then to  $180^\circ\text{C}$  (hold for 15 minutes).<sup>8</sup>

**Table S 1** Comparison of the LOD of RM-CIIP toward  $\text{Cu}^{2+}$  with other particle-based sensors.

| Sensor Name                        | LOD                 | Ref      |
|------------------------------------|---------------------|----------|
| f-sporopollenin                    | 0.741 $\mu\text{M}$ | [9]2021  |
| BODIPY based magnetic nanomaterial | 1 $\mu\text{M}$     | [10]2013 |

|                                                                                     |                                           |           |
|-------------------------------------------------------------------------------------|-------------------------------------------|-----------|
| Au nanoparticle                                                                     | 5 $\mu\text{M}$                           | [11]2015  |
| l-Cysteine-capped ZnS QDs                                                           | 7.1 $\mu\text{M}$                         | [12]2009  |
| Aza chalcone                                                                        | 10 $\mu\text{M}$                          | [13]2015  |
| ZnO@ZnS core-shell nanoparticle                                                     | 15 $\mu\text{M}$                          | [14]2014  |
| AuNP                                                                                | 20 $\mu\text{M}$                          | [15]2010  |
| Glutathione-capped Zn <sub>x</sub> Hg <sub>1-x</sub> Se QDs                         | 20 $\mu\text{M}$                          | [16]2009  |
| Sp-APTES-monoBODIPY                                                                 | 0.49 $\mu\text{M}$                        | [17]2022  |
| DHIH                                                                                | 0.52 $\mu\text{M}$                        | [18]2015  |
| Ru@FITC-MSN                                                                         | 0.36 $\mu\text{M}$                        | [19]2020  |
| Diphenylcarbazine (DPC)                                                             | 0.16 $\mu\text{M}$                        | [20]2015  |
| Chemosensor NRC                                                                     | 0.18 $\mu\text{M}$                        | [21]2011  |
| inorganic-organic chemosensing material MS-NSP                                      | 0.19 $\mu\text{M}$                        | [22]2022  |
| waste cotton fabric WCF                                                             | 7.8 $\mu\text{M}$                         | [23]2022  |
| Fe <sub>3</sub> O <sub>4</sub> @SiO <sub>2</sub> @TiO <sub>2</sub> -APTMSmonoBODIPY | 0.47 $\mu\text{M}$                        | [24]2022  |
| {[Cd(HL)]·CH <sub>3</sub> OH} <sub>n</sub>                                          | 5.7 $\mu\text{M}$                         | [25]2024  |
| morpholine-modified polyacrylamide derivatives (MMPAm)                              | 17.3 $\mu\text{M}$                        | [26]2024  |
| copper ion-imprinted materials (RHA-CIIM)                                           | 0.063 $\mu\text{M}$ /4.03 $\mu\text{g/L}$ | This work |

**Table S2** The RSD of RHA-CIIM

| F/F <sub>0</sub> =0.9993-0.1028[Cu <sup>2+</sup> ] |                            |                  |      |
|----------------------------------------------------|----------------------------|------------------|------|
| [Cu <sup>2+</sup> ] (mg/L)                         | [Cu <sup>2+</sup> ] (mg/L) | F/F <sub>0</sub> | RSD  |
| 0.60                                               | 0.6135                     | 0.9362           | 2.1% |
|                                                    | 0.5905                     | 0.9386           |      |
|                                                    | 0.6085                     | 0.9367           |      |
|                                                    | 0.6034                     | 0.9373           |      |
|                                                    | 0.6305                     | 0.9345           |      |
|                                                    | 0.5976                     | 0.9379           |      |

## References

- (1) Ahumada, M.; Lissi, E.; Montagut, A. M.; Valenzuela-Henríquez, F.; Pacioni, N. L.; Alarcon, E. I. Association models for binding of molecules to nanostructures. *Analyst*. **2017**, *142*(12), 2067-2089.
- (2) Shortreed, M.; Kopelman, R.; Kuhn, M.; Hoyland, B. Fluorescent Fiber-Optic Calcium Sensor for Physiological Measurements. *Anal. Chem.* **1996**, *68*(8), 1414-1418.
- (3) Azad, F. N.; Ghaedi, M.; Dashtian, K.; Montazerozohori, M.; Hajati, S. Alipanahpour, E. Preparation and characterization of MWCNTs functionalized by N-(3-nitrobenzylidene)-N'-trimethoxysilylpropyl-ethane-1,2-diamine for the removal of aluminum(III) ions via complexation with eriochrome cyanine R: spectrophotometric detection and optimization. *RSC Adv.* **2015**, *5*(75), 61060-61069.
- (4) Seliem, M. K.; Komarneni, S.; Khadra, M. Phosphate removal from solution by composite of MCM-41 silica with rice husk: Kinetic and equilibrium studies. *Microporous Mesoporous Mater.* **2016**, *224*, 51-57.
- (5) Li, N.; Yue, Q. Y.; Gao B. Y.; Xu, X.; Kan, Y. J.; Zhao, P. Magnetic graphene oxide functionalized by poly dimethyl diallyl ammonium chloride for efficient removal of Cr (VI), *J. Taiwan Inst. Chem. Eng.* **2018**, *91*, 499-506.
- (6) Foo, K. Y.; Hameed, B. H. Insights into the modeling of adsorption isotherm

- systems. *Chem. Eng. J.* **2010**, *156*, 2-10.
- (7) Kong, D. L.; N. Wang, N.; Qiao, N.; Wang, Q.; Wang, Z.; Zhou, Z. Y.; Ren, Z. Q. Facile preparation of ion-imprinted chitosan microspheres enwrapping Fe<sub>3</sub>O<sub>4</sub> and graphene oxide by inverse suspension cross-linking for highly selective removal of copper (II). *ACS Sustain Chem. Eng.* **2017**, *5*, 7401-7409.
- (8) Mo, A.; Dang, Y.; Wang, J.; Liu, C.; Yang, H.; Zhai, Y.; Wang, Y.; Yuan, Y. Heavy metal residues, releases and food health risks between the two main crayfish culturing models: Rice-crayfish coculture system versus crayfish intensive culture system. *Environ. Pollut.* **2022**, *305*, 119216.
- (9) Bilgic, A. Novel BODIPY-based fluorescent Lycopodium clavatum sporopollenin microcapsules for detection and removal of Cu (II) ions. *Colloids Surf. A Physicochem. Eng. Asp.* **2021**, *631*, 127658.
- (10) Isaad, J.; El Achari, A. BODIPY modified silica coated magnetite nanoparticles as fluorescent hybrid material for Cu (II) detection in aqueous medium. *Dyes Pigm.* **2013**, *99*, 878-886.
- (11) Ye, Y. J.; Lv, M. X.; Zhang, X.Y.; Zhang, Y. X. Colorimetric determination of copper (II) ions using gold nanoparticles as a probe. *RSC Adv.* **2015**, *5*, 102311-102317.
- (12) Koneswaran, M.; Narayanaswamy, R. L-Cysteine-capped ZnS quantum dots based fluorescence sensor for Cu<sup>2+</sup> ion. In: Chem, S.A.B. (Ed.), *Sens. Actuators, B.* **2009**, *139(1)*, 104-109.
- (13) Dhar, P. C.; Pal, A.; Mohanty, P.; Bag, B. Colorimetric detection of Cu (II) ion



- with a 1,3-bis-azachalcone derivative. *Sens. Actuators B Chem.* **2015**, *219*, 308-314.
- (14) Sadollahkhani, A.; Hatamie, A.; Nur, O.; Willander, M.; Zargar, B.; Kazeminezhad, I. Colorimetric disposable paper coated with ZnO@ZnS core-shell nanoparticles for detection of copper ions in aqueous solutions. *ACS Appl. Mater. Interfaces.* **2014**, *6*, 17694-17701.
- (15) Xu, X. Y.; Daniel, W. L.; Wei, W.; Mirkin, C. A. Colorimetric Cu<sup>2+</sup> Detection Using DNA-Modified Gold-Nanoparticle Aggregates as Probes and Click Chemistry. *SMALL.* **2010**, *6*(5), 623-626.
- (16) Liu, F. C.; Chen, Y. M.; Lin, J. H.; Tseng, W. L. Synthesis of highly fluorescent glutathione-capped Zn<sub>x</sub>Hg<sub>1-x</sub>Se quantum dot and its application for sensing copper ion. *J. Colloid Interface Sci.* **2009**, *337*(2), 414-419.
- (17) Bilgic, A.; Cimen, A.; Bastug, E.; Kursunlu, A. N. Fluorescent sporopollenin microcapsule modified by BODIPY for sensitive&selective recognition and efficient removal of Cu (II) from aqueous solution. *Chem. Eng. Res. Des.* **2022**, *178*, 61-72.
- (18) Liu Q.; Fei, Q.; Fei, Y. Q.; Fan, Q.; Shan, H. Y.; Feng G. D.; Huan, Y. F. A novel colorimetric probe derived from isonicotic acid hydrazide for copper (II) determination based on internal charge transfer (ICT). *Spectrochim. Acta, Part A.* **2015**, *151*, 785-789.
- (19) Liu, J. P.; Duan, C. C.; Zhang, W. Z.; Ta, H. T.; Yuan, J. L.; Zhang, R.; Xu, Z. P. Responsive nanosensor for ratiometric luminescence detection of hydrogen sulfide

- in inflammatory cancer cells. *Anal. Chim. Acta.* **2020**, *1103*, 156-163.
- (20) Pourbasheer, E.; Morsali, S.; Banaei, A.; Aghabalazadeh, S.; Ganjali, M. R.; Norouzi, P. Design of a novel optical sensor for determination of trace amounts of copper by UV/ vis spectrophotometry in the real samples. *J. Ind. Eng. Chem.* **2015**, *26*, 370-374.
- (21) Yu, C. W.; Chen, L. X.; Zhang, J.; Li, J. H.; Liu, P.; Wang, W. H.; Yan, B. “Off-On” based fluorescent chemosensor for Cu<sup>2+</sup> in aqueous media and living cells. *Talanta.* **2011**, *85(3)*, 1627-1633.
- (22) Zhang, Y. Y.; Zhu, T.; Wang, H. Y.; Zheng, L. L.; Chen, M.; Wang, W. Y. Preparation of a bis-Schiff base immobilized mesoporous SBA-15 nanosensor for the fluorogenic sensing and adsorption of Cu<sup>2+</sup>. *Dalton Trans.* **2022**, *51(18)*, 7210-7222.
- (23) Jiang, H. Y.; Zhao, Z. Y.; Liao, Y. X.; Tang, C. C.; Tremblay, P. L.; Zhang, T. A recyclable colorimetric sensor made of waste cotton fabric for the detection of copper ions. *Cellulose.* **2022**, *29*, 5103-5115.
- (24) Bilgic, A. Fabrication of monoBODIPY-functionalized Fe<sub>3</sub>O<sub>4</sub>@SiO<sub>2</sub>@TiO<sub>2</sub> nanoparticles for the photocatalytic degradation of rhodamine B under UV irradiation and the detection and removal of Cu (II) ions in aqueous Solutions. *J. Alloys Compd.* **2022**, *899*, 163360.
- (25) Zhang, L. Wang, R.Y.; Wang, W. B.; Dong, Y.L.; Teng, B.S.; Wu, B.L. An amino acid-functionalized coordination polymer of Cd(II) as a fluorescent probe detecting Cu(II) ion. *Journal of Solid State Chemistry.* **2024**, *335*, 124704.

(26) Fan, E.; Guo, H.Y.; Hao, T.T.; Zhao, R.H.; Zhang, P.F.; Feng, Y.Y.; Liu, Y.F.; Deng, K.L. Morpholine-modified polyacrylamides with Polymerization-Induced emission and its specific detection to Cu<sup>2+</sup> ions. *Spectrochimica Acta Part A: Molecular and Biomolecular Spectroscopy*. **2024**, 309, 123782.
